# Supplementary material
Source: MDPI journal article supplement (https://www.mdpi.com/2073-4395/14/4/850)
Supplement: s1 [file s1]

Table S1

Primers used for real-time PCR analysis.

| Gene ID    | Primer sequences (5'-3')                            | Annotation |
|------------|-----------------------------------------------------|------------|
| KP053396   | F: TTGGCATCGTTGAGGGTCT<br>R: CAGTGGGAACACGGAAAGC    | CsGAPDH    |
| CSS0039893 | F: GCGTCTACCATGGCTCTCTC<br>R: GCTTCCAGATGGGACTTGCT  | CsLhcb1    |
| CSS0018005 | F: TAATTCCGCCAGAAACCGCT<br>R: CTGGAACCTCCTGTGCTCTG  | CsLhca3    |
| CSS0043476 | F: GCCTCGCCGACCTATATTCC<br>R: TCTAACCATTTCGGGCGCTTT | CsLhcb4    |
| CSS0014124 | F: GCGGATGTAAAATCGACGCC<br>R: CGGCATCTTGCCACGTAATG  | CsLhcb4    |
| CSS0020461 | F: TTGCCATGGGGACAACACTT<br>R: CCTTCTTGTCCTGACTCCC   | CsPsbP     |
| CSS0016237 | F: TTTAGGGTTGAGGCCAGTCG<br>R: GGTATACGCCCTTCCCCTTG  | CsPsbR     |
| CSS0002873 | F: AGCTCAAAAGTGGGGATGGG<br>R: CCTTCTGTGCTCAGCCTCTC  | CsPsbW     |
| CSS0017427 | F: ACCCCCTTTGTGACAGGCTA<br>R: TTCCTTGAGGCCCAACATGA  | CsPsb28    |
