# Supplementary material
Source: MDPI journal article supplement (https://www.mdpi.com/2073-4395/14/4/850)
Supplement: s1 [file s1]

**Table S2**

Quality of transcriptomic data.

| Samples | Raw reads | Clean reads | Clean bases (Gb) | Error rate (%) | Q20 (%) | Q30 (%) | GC content (%) | Mapping ratio (%) |
|---------|-----------|-------------|------------------|----------------|---------|---------|----------------|-------------------|
| T_1     | 45988332  | 44135614    | 6.62             | 0.03           | 97.94   | 93.95   | 43.45          | 87.66             |
| T_2     | 44417148  | 42770534    | 6.42             | 0.03           | 97.95   | 93.94   | 42.85          | 86.84             |
| T_3     | 44607896  | 43458038    | 6.52             | 0.03           | 97.95   | 93.98   | 43.57          | 87.09             |
| STS_1   | 54142434  | 52131192    | 7.82             | 0.03           | 97.9    | 93.77   | 44.67          | 87.89             |
| STS_2   | 54342808  | 53193934    | 7.98             | 0.03           | 97.85   | 93.67   | 44.59          | 87.13             |
| STS_3   | 50404382  | 48865720    | 7.33             | 0.03           | 98.11   | 94.29   | 44.5           | 87.92             |
